# Supplementary material
Source: PubMed Central journal article supplement (PMC7226623)
Supplement: 2020-00025R1_Production_Supplemental_Table_online_supp.pdf [file 2020-00025R1_Production_Supplemental_Table_online_supp.pdf]

Supplementary Table 1

Count of total positive tubules for SV40 IHC and RNA ISH by individual pathologists (Path A, Path B, Path C)

| SV40 IHC Path A | SV40 IHC Path B | SV40 IHC Path C | RNA ISH Path A | RNA ISH Path B | RNA ISH Path C |
|-----------------|-----------------|-----------------|----------------|----------------|----------------|
| 5               | 5               |                 | 1              | 0              |                |
| 5               | 4               |                 | 0              | 7              |                |
| 5               | 10              |                 | 0              | 1              |                |
| 86              | 76              |                 | 36             | 38             |                |
| 1               |                 |                 | 5              | 4              |                |
| 5               | 4               |                 | 4              | 3              |                |
| 32              | 25              |                 | 3              | 2              |                |
| 65              | 52              |                 | 21             | 22             |                |
| 97              | 92              |                 | 7              | 9              |                |
| 19              | 17              |                 | 6              | 6              |                |
| 82              | 56              | 74              | 22             | 20             |                |
| 110             | 79              | 105             | 8              | 5              |                |
| 273             | 285             | 225             | 312            | 360            |                |
| 55              | 39              |                 | 29             | 32             |                |
| 36              | 20              |                 | 30             | 39             |                |
| 124             | 97              |                 | 65             | 58             |                |
| 680             | 605             |                 | 292            | 267            |                |
| 13              | 18              |                 | 13             | 9              |                |
| 246             | 185             |                 | 253            | 259            |                |
| 3               | 2               |                 | 148            | 128            |                |
| 90              | 97              |                 | 39             | 34             |                |
| 13              | 10              |                 | 0              | 0              |                |
| 263             | 234             |                 | 189            | 202            |                |
| 88              | 105             |                 | 131            | 125            |                |
| 4               | 3               |                 | 0              | 0              |                |
| 77              | 48              |                 | 119            | 110            |                |
| 15              | 11              |                 | 0              | 0              |                |
| 1               | 1               |                 | 55             | 53             |                |
| 0               | 0               |                 | 4              | 5              |                |
| 1               | 1               |                 | 0              | 0              |                |
| 308             | 320             |                 | 193            | 158            |                |
| 18              | 10              |                 | 3              | 5              |                |
| 58              | 44              |                 | 5              | 6              |                |
| 20              | 17              |                 | 5              | 5              |                |
| 20              | 23              |                 | 11             | 8              |                |
| 1               | 1.5             |                 | 0              | 0              |                |
| 19              | 19              |                 | 9              | 8              |                |
| 37              | 43              |                 | 1              | 1              |                |
| 5               | 6               |                 | 1              | 1              |                |
| 5               | 4               |                 | 4              | 5              |                |
| 2               | 4               |                 | 0              | 0              |                |
| 101             | 68              | 91              | 72             | 68             |                |
| 15              | 13              |                 | 5              | 4              |                |
| 47              | 30              |                 | 22             | 22             |                |
| 56              | 65              |                 | 59             | 62             |                |
| 25              |                 |                 | 21             |                |                |
| 45              | 34              |                 | 7              | 3              |                |
| 48              | 24              |                 | 36             | 12             |                |
| 1               | 0               |                 | 0              | 0              |                |
| 44              | 38              |                 | 34             | 15             |                |
| 32              | 14              |                 | 23             | 13             |                |
| 76              | 52              | 81              | 12             | 9              | 8              |
| 148             | 70              | 81              | 135            | 76             | 118            |
| 5               | 3               |                 | 12             | 9              |                |
| 28              | 7               | 24              | 16             | 11             |                |
| 46              | 27              | 44              | 78             | 75             |                |
| 12              | 5               |                 | 9              | 2.5            |                |
| 3               | 2.5             |                 | 4              | 0              |                |
| 0               | 0               |                 | 168            | 101            |                |
| 0               | 0               |                 | 62             | 44             |                |
| 0               | 0               |                 | 133            | 163            |                |

Path A, B, C indicate individual pathologists
